# Supplementary figures and images for: Northern elephant seals adjust gliding and stroking patterns with changes in buoyancy: validation of at-sea metrics of body density
Source: Oxford University Press journal article supplement (doi:10.1242/jeb.055137), 2011-08-10

**A** Floated-and-Weighted condition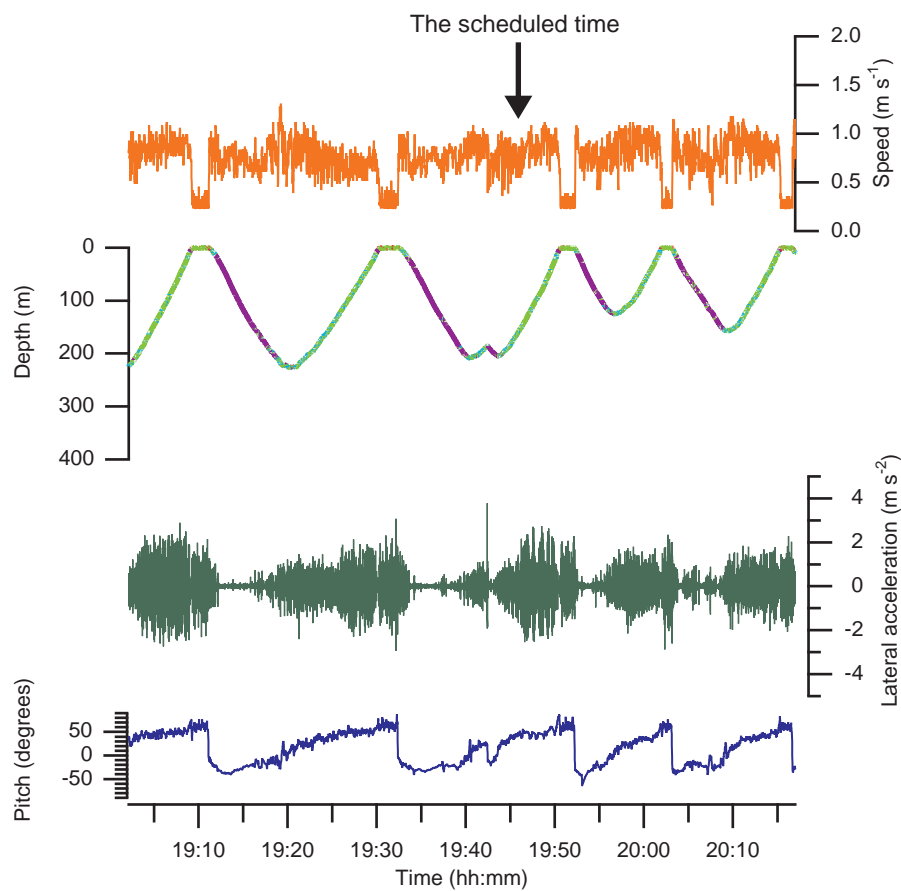**B** Floated condition      Unattached condition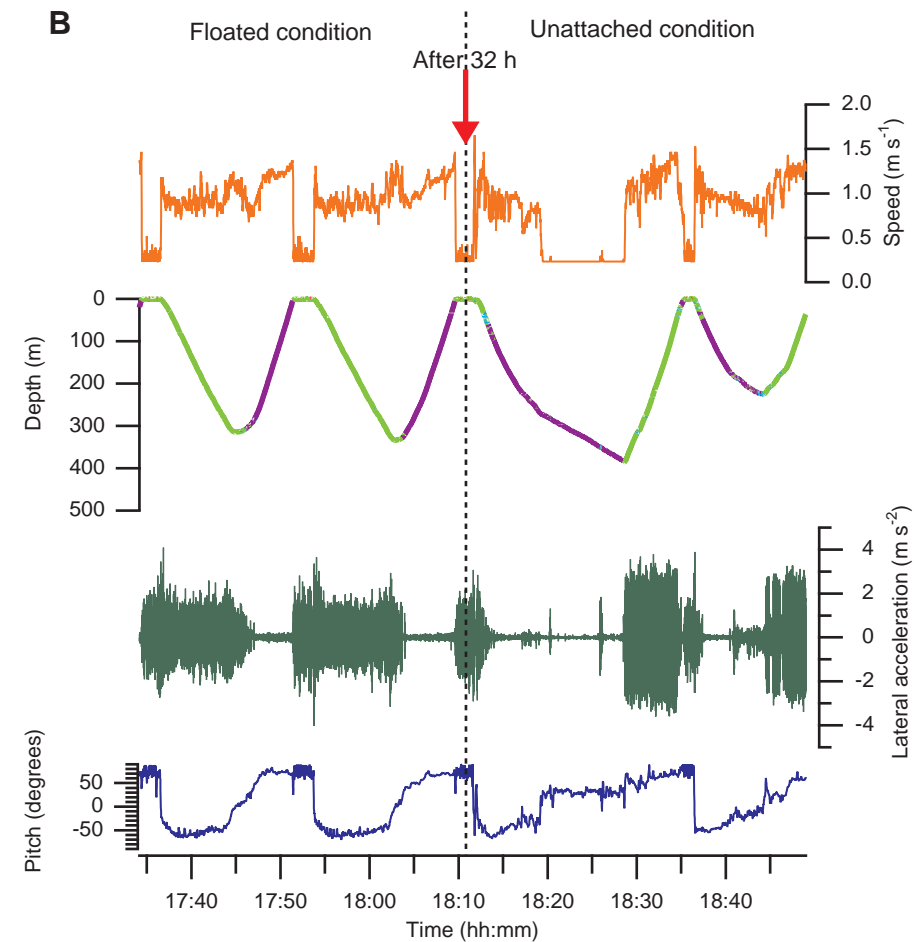

Supplement: jeb055137figs1.pdf [file jeb055137figs1.pdf]

Weighted : □ Ascent; □ Descent; + Horizontal  
Unattached: ● Ascent; ● Descent; + Horizontal

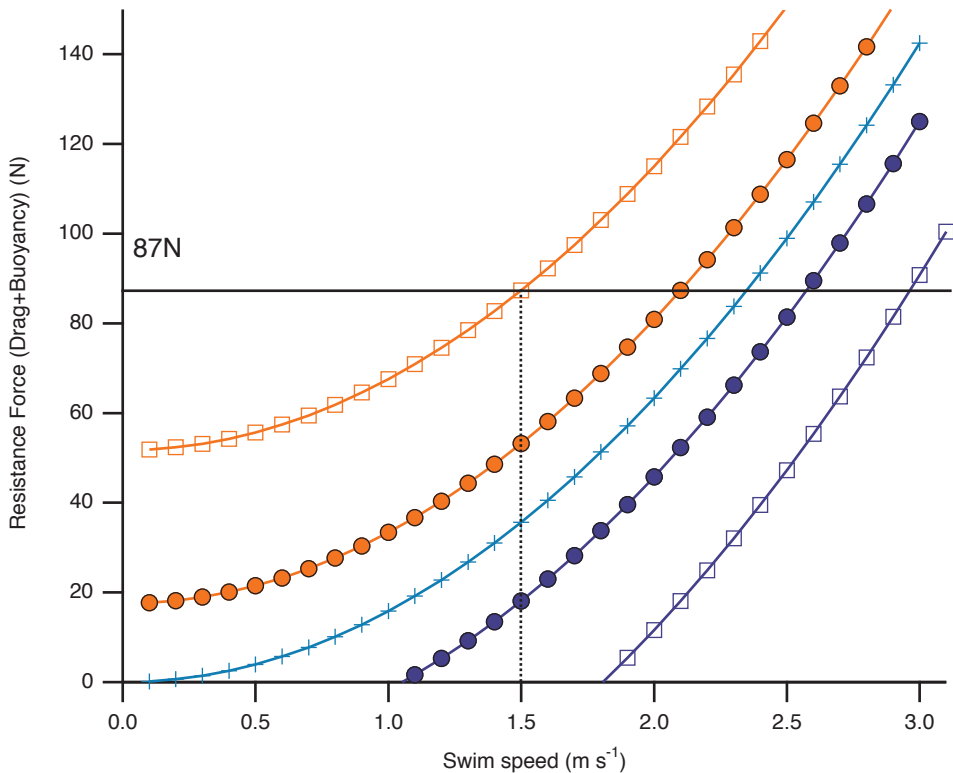

Supplement: jeb055137figs2.pdf [file jeb055137figs2.pdf]
